# Supplementary material for: RNA-seq analysis of the gonadal transcriptome during Alligator mississippiensis temperature-dependent sex determination and differentiation
Source: PubMed Central journal article supplement (PMC4727388; doi:10.1186/s12864-016-2396-9), 2016-01-25

**a**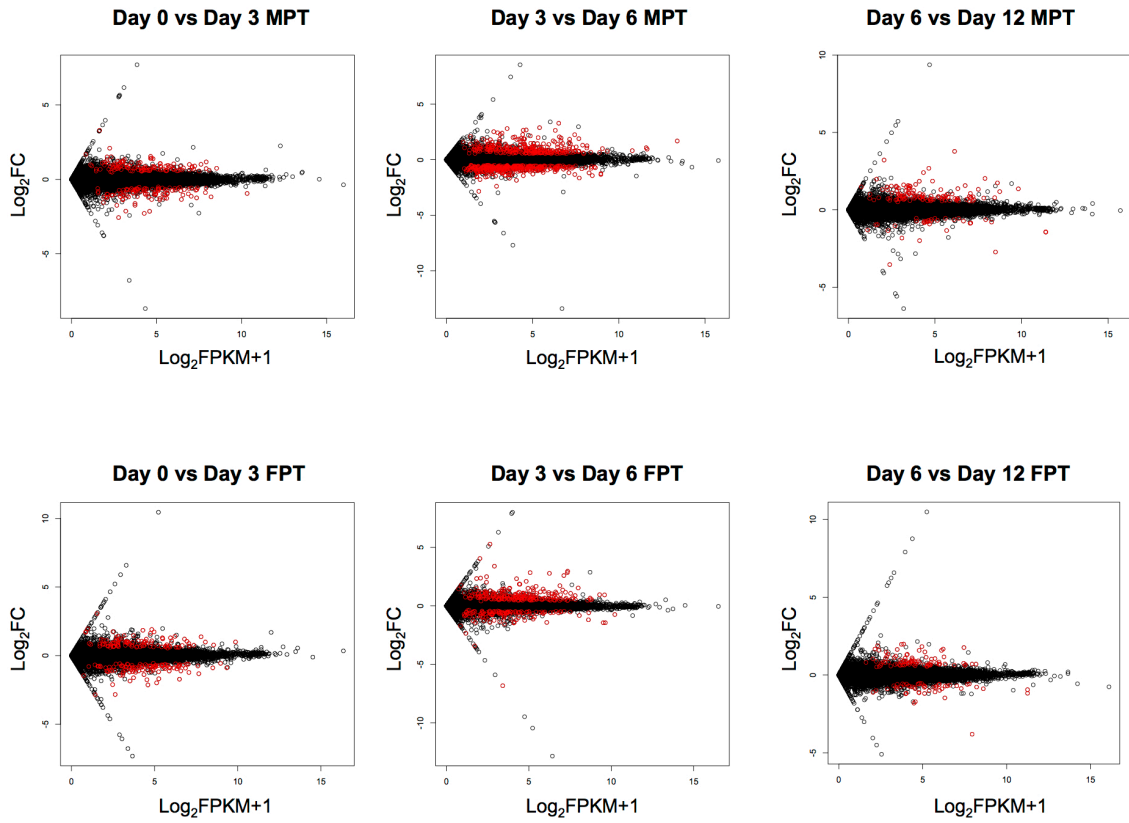**b**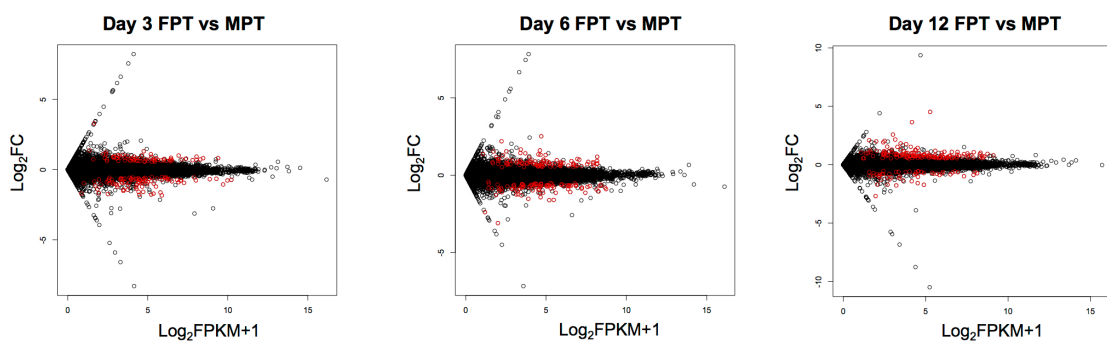

Supplement: 12864_2016_2396_MOESM2_ESM.pdf [file 12864_2016_2396_MOESM2_ESM.pdf]
